# Supplementary material for: Freeze-Drying-Assisted Preparation of High-Compaction-Density LiMn0.69Co0.01Fe0.3PO4 Cathode Materials with High-Capacity and Long Life-Cycle for Lithium Ion Batteries
Source: MDPI journal article supplement (doi:10.3390/batteries10040114), 2024-03-25
Supplement: s1 [file s1]

## Supporting Information

# Freeze-drying-Assisted Preparation of High-Compaction-Density $\text{LiMn}_{0.69}\text{Co}_{0.01}\text{Fe}_{0.3}\text{PO}_4$ Cathode Materials with High-Capacity and Long Life-Cycle for Lithium ion Batteries

Shaojun Liu <sup>1,†</sup>, Jingang Zheng <sup>1,†</sup>, Hao Huang <sup>1</sup>, Hongyang Li <sup>1</sup>, Han Zhang <sup>1</sup>, Lixiang Li <sup>1</sup>, Baigang An <sup>1</sup>, Yuanhua Xiao <sup>2,\*</sup> and Chengguo Sun <sup>1,3,\*</sup>

<sup>1</sup> School of Chemical Engineering, University of Science and Technology Liaoning, Anshan 114051, China; sjliu@home.ipe.ac.cn (S.L.); zjg1764124@163.com (J.Z.); hhao2000@126.com (H.H.); hnjzlh@126.com (H.L.); hzhang0807@163.com (H.Z.); lxli2005@126.com (L.L.); bgan@ustl.edu.cn (B.A.)

<sup>2</sup> College of Materials and Chemical Engineering, State Laboratory of Surface and Interface Science and Technology, Zhengzhou University of Light Industry, Zhengzhou 450002, China

<sup>3</sup> School of Chemical Engineering, Nanjing University of Science and Technology, Nanjing 210094, China

\* Correspondence: yuanhua\_xiao@zzuli.edu.cn (Y.X.); sunyangguo2004@163.com (C.S.)

† These authors contributed equally to this work and should be regarded as co-first authors.

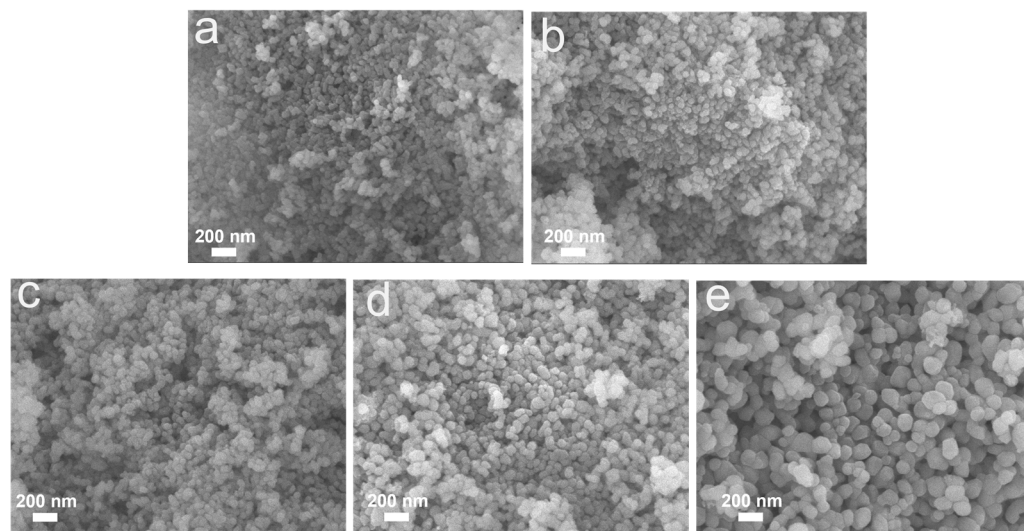

**Figure S1.** SEM images of LMFP-M1/C (a) and LMFP-400/C, LMFP-450/C, LMFP-500/C, LMFP-550/C (b, c, d, e).

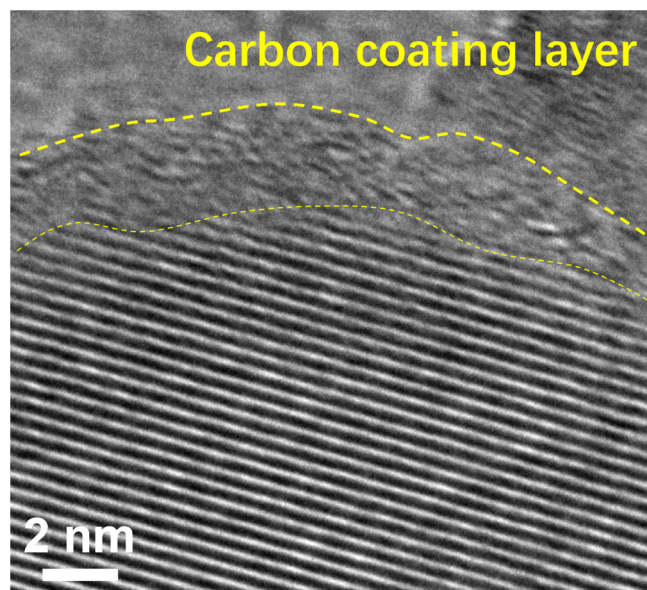

**Figure S2.** The TEM image of LMFP-M1 sample.

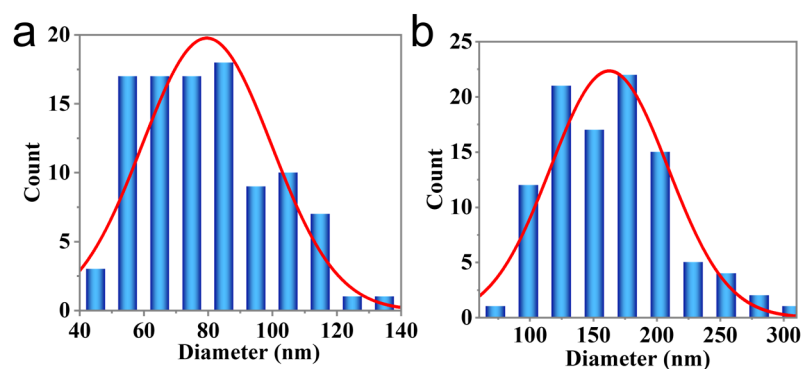

**Figure S3.** particle size distribution of (a) LMFP-M1 and (b) LMFP-500.

**Table S1.** Cycle performance comparison of LMFP-based cathode materials prepared by different methods.

| Samples                                                  | Synthetic method        | Electrochemical performances<br>Cyclic capacity (mAh g <sup>-1</sup> ) | References |
|----------------------------------------------------------|-------------------------|------------------------------------------------------------------------|------------|
| LMFP-500/C                                               | Solvothermal            | 143.8@1C, remains 90% after 800 cycles                                 | This work  |
| LiMn <sub>0.8</sub> Fe <sub>0.2</sub> PO <sub>4</sub>    | Microwave-sol-vothermal | 129@0.5C, remains 95.7% after 50 cycles                                | 50         |
| LiMn <sub>0.5</sub> Fe <sub>0.5</sub> PO <sub>4</sub>    | Solvothermal            | 143.8@1C, remains 89% after 500 cycles                                 | 51         |
| LiMn <sub>0.7</sub> Fe <sub>0.3</sub> PO <sub>4</sub>    | Solvothermal            | 153.9@1C, remains 95% after 100 cycles                                 | 27         |
| LiMn <sub>0.5</sub> Fe <sub>0.5</sub> PO <sub>4</sub> /C | Solvothermal            | 142@1C, remains 95% after 100 cycles                                   | 52         |

|                                                        |                      |                                          |    |
|--------------------------------------------------------|----------------------|------------------------------------------|----|
| $\text{LiMn}_{0.8}\text{Fe}_{0.2}\text{PO}_4/\text{C}$ | Solvothermal         | 146.1@1C, remains 92.7% after 150 cycles | 45 |
| $\text{LiMn}_{0.5}\text{Fe}_{0.5}\text{PO}_4$          | Sol-gel              | 110@0.33C, remains 95% after 40 cycles   | 53 |
| $\text{LiMn}_{0.5}\text{Fe}_{0.5}\text{PO}_4$          | Solvothermal         | 145@1C, remains 95% after 100 cycles     | 54 |
| $\text{LiMn}_{1/3}\text{Fe}_{1/3}\text{PO}_{1/3}$      | Solvothermal         | 158@0.1C, remains 80% after 100 cycles   | 55 |
| $\text{LiMn}_{0.8}\text{Fe}_{0.2}\text{PO}_4$          | Solid-state reaction | 140@0.2C, remains 90.2% after 200 cycles | 36 |

**Table S2.** The specific capacities at various C-rates of LMFP-M1/C and LMFP-400/C, LMFP-450/C, LMFP-500/C, LMFP-550/C.

| Samples    | 0.1C<br>mAh/g | 0.2C<br>mAh/g | 1C<br>mAh/g | 2C<br>mAh/g | 5C<br>mAh/g | 10C<br>mAh/g |
|------------|---------------|---------------|-------------|-------------|-------------|--------------|
| LMFP-M1/C  | 164.0         | 162.9         | 151.8       | 148.1       | 143.6       | 136.1        |
| LMFP-400/C | 164.2         | 154.2         | 146.5       | 143.3       | 134.6       | 116.1        |
| LMFP-450/C | 165.0         | 153.7         | 142.3       | 137.3       | 126.7       | 107.2        |
| LMFP-500/C | 166.2         | 151.6         | 139.5       | 133.8       | 122.2       | 103.5        |
| LMFP-550/C | 162.2         | 145.7         | 131.0       | 125.6       | 117.6       | 105.4        |
